# Supplementary material for: Effects of In Ovo Injection of α-Ketoglutaric Acid on Hatchability, Growth, Plasma Metabolites, and Antioxidant Status of Broilers
Source: MDPI journal article supplement (doi:10.3390/antiox11112102), 2022-10-25
Supplement: s1 [file s1]

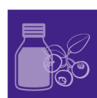**Table S1.** Effect of *in ovo* administration of AKG on the relative and absolute organ weight of liver, spleen and bursa of Fabricius of broilers at day 21 of age\*.

| Parameters                        | Treatments |        |        |        | Pooled SEM | p-value |       |       |
|-----------------------------------|------------|--------|--------|--------|------------|---------|-------|-------|
|                                   | 0AKG       | 0.5AKG | 1.0AKG | 1.5AKG |            | ANOVA   | Lin   | Quad  |
| Absolute organ weight (g)         |            |        |        |        |            |         |       |       |
| Liver                             | 27.38      | 28.09  | 28.17  | 28.00  | 0.568      | 0.965   | 0.712 | 0.713 |
| Spleen                            | 0.73       | 1.12   | 0.72   | 0.74   | 0.063      | 0.054   | 0.533 | 0.146 |
| Bursa of Fabricius                | 1.49       | 1.39   | 1.37   | 1.36   | 0.060      | 0.891   | 0.472 | 0.724 |
| Relative organ weight (g/100g BW) |            |        |        |        |            |         |       |       |
| Liver                             | 3.37       | 3.72   | 3.69   | 3.45   | 0.085      | 0.39    | 0.791 | 0.09  |
| Spleen                            | 0.09       | 0.15   | 0.10   | 0.09   | 0.010      | 0.071   | 0.584 | 0.096 |
| Bursa of Fabricius                | 0.18       | 0.18   | 0.18   | 0.17   | 0.006      | 0.359   | 0.329 | 0.682 |

\*At 17.5 day of incubation, eggs were injected with 0.6mL AKG solution with a concentration of 0% (0AKG), 0.5% (0.5AKG), 1.0% (1.0AKG), and 1.5% (1.5AKG). Chicks obtained from each treatment group at hatch were reared as per standard temperature and humidity guidelines. At day 21 of age, chickens from each treatment groups were sampled and the different organ weights were recorded. Data are presented as Mean  $\pm$  SEM (n=6). Abbreviations: Lin, linear effect; Quad, quadratic effect.

**Table S2.** Effects of *in ovo* feeding of  $\alpha$ -ketoglutaric acid (AKG) on the absolute and relative length of different parts of the small intestine and average caecum length of broilers at day 21 of age\*.

| Parameters                   | Treatments |        |        |        | Pooled SEM | p-value |       |       |
|------------------------------|------------|--------|--------|--------|------------|---------|-------|-------|
|                              | 0AKG       | 0.5AKG | 1.0AKG | 1.5AKG |            | ANOVA   | Lin   | Quad  |
| Absolute length (cm)         |            |        |        |        |            |         |       |       |
| Duodenum                     | 25.67      | 25.50  | 23.83  | 25.00  | 0.381      | 0.330   | 0.292 | 0.392 |
| Jejunum                      | 57.67      | 57.50  | 53.17  | 57.67  | 1.120      | 0.420   | 0.675 | 0.317 |
| Ileum                        | 53.50      | 53.33  | 53.83  | 56.67  | 0.809      | 0.443   | 0.172 | 0.356 |
| Relative length (cm/100g BW) |            |        |        |        |            |         |       |       |
| Duodenum                     | 3.17       | 3.37   | 3.12   | 3.10   | 0.068      | 0.491   | 0.464 | 0.425 |
| Jejunum                      | 7.10       | 7.64   | 7.05   | 7.09   | 0.199      | 0.713   | 0.734 | 0.552 |
| Ileum                        | 6.59       | 7.02   | 7.12   | 7.07   | 0.180      | 0.742   | 0.355 | 0.518 |
| Cecum#                       | 14.46      | 13.71  | 13.21  | 14.21  | 0.238      | 0.264   | 0.569 | 0.069 |

\*At 17.5 day of incubation, eggs were injected with 0.6mL AKG solution with a concentration of 0% (0AKG), 0.5% (0.5AKG), 1.0% (1.0AKG), and 1.5% (1.5AKG). Chicks obtained from each treatment group at hatch were reared as per standard temperature and humidity guidelines. At day 21 of age, chickens from each treatment groups were sampled and the different organ lengths were recorded. Data are presented as Mean  $\pm$  SEM (n=6). Abbreviations: Lin, linear effect; Quad, quadratic effect.

# Cecal length was calculated as an average of both sides of the ceca.
